# Supplementary material
Source: Springer Nature journal article supplement (https://www.springermedizin.de/resource/supplementary/12889_2012_5357_MOESM1_ESM.pdf/9495044)
Supplement: MOESM1 [file 9495044]

| <b>Diagnosis</b>        | <b>No sign and/or symptoms<sup>‡</sup></b> | <b>Number with infection</b> | <b>Number without infection</b> | <b>Number needed to screen to detect one woman with infection</b> | <b>95% CI<sup>#</sup></b> |
|-------------------------|--------------------------------------------|------------------------------|---------------------------------|-------------------------------------------------------------------|---------------------------|
| Chlamydia               | All ages                                   | 31                           | 624                             | 22                                                                | 16, 31                    |
|                         | ≤ 25 yrs                                   | 5                            | 76                              | 17                                                                | 9, 108                    |
|                         | > 25 yrs                                   | 26                           | 546                             | 23                                                                | 16, 34                    |
|                         | Missing                                    | 0                            | 2                               | ∞                                                                 | 2, ∞                      |
| Gonorrhea               | All ages                                   | 9                            | 646                             | 73                                                                | 39, 159                   |
|                         | ≤ 25 yrs                                   | 3                            | 78                              | 28                                                                | 10, 130                   |
|                         | > 25 yrs                                   | 6                            | 566                             | 96                                                                | 45, 260                   |
|                         | Missing                                    | 0                            | 2                               | ∞                                                                 | 2, ∞                      |
| Chlamydia or Gonorrhea* | All ages                                   | 38                           | 617                             | 18                                                                | 13, 25                    |
|                         | ≤ 25 yrs                                   | 8                            | 73                              | 11                                                                | 6, 23                     |
|                         | > 25 yrs                                   | 30                           | 542                             | 20                                                                | 14, 29                    |
|                         | Missing                                    | 0                            | 2                               | ∞                                                                 | 2, ∞                      |

<sup>‡</sup> Any of symptomatic vaginal discharge, urethral discharge, or lower abdominal pain or cervix examination (inflammation/pus/swab pus/blood or other) or vaginal discharge examination (white/yellow/green/other) or cervical motion tenderness during bimanual examination.

\* 2/655 positive for both chlamydia and gonorrhea.

∞: infinity.

<sup>#</sup> 95% exact binomial confidence interval.
